# Supplementary material for: Effect of thrombectomy on oedema progression and clinical outcome in patients with a poor collateral profile
Source: PubMed Central journal article supplement — Stroke Vasc Neurol. 2020 Nov 18;6(2):222–9. doi: 10.1136/svn-2020-000570 (PMC8258058; doi:10.1136/svn-2020-000570), 2020-11-18
Supplement: svn-2020-000570supp001.pdf [file svn-2020-000570supp001.pdf]

**Online Supplement****Supplemental Table I****Lesion water uptake in follow-up CT****Univariable linear regression**

| <b>Parameter</b>                       | <b>Coefficient</b> | <b>SD</b> | <b>p value</b> |
|----------------------------------------|--------------------|-----------|----------------|
| Vessel recanalization (TICI $\geq$ 2b) | -7.3%              | 1.51      | <0.001         |
| Collateral Score (1-point increase)    | -2.9%              | 1.13      | 0.01           |
| ASPECTS (1-point increase)             | -0.5%              | 0.38      | 0.19           |

**Multivariable linear regression\***

|                                        |       |      |        |
|----------------------------------------|-------|------|--------|
| Vessel recanalization (TICI $\geq$ 2b) | -6.6% | 1.54 | <0.001 |
| Collateral Score (1-point increase)    | -1.8% | 1.04 | 0.08   |

\*adjusted for ASPECTS

**Total lesion volume in follow-up CT****Univariable linear regression**

| <b>Parameter</b>                       | <b>Coefficient</b> | <b>SD</b> | <b>p value</b> |
|----------------------------------------|--------------------|-----------|----------------|
| Vessel recanalization (TICI $\geq$ 2b) | -74 mL             | 19.0      | <0.001         |
| Collateral Score (1-point increase)    | -38 mL             | 12.4      | 0.003          |
| ASPECTS (1-point increase)             | -20 mL             | 3.8       | <0.001         |
| Age (1 year increase)                  | -1.8 mL            | 0.73      | 0.01           |

**Multivariable linear regression\***

|                                        |         |      |        |
|----------------------------------------|---------|------|--------|
| Vessel recanalization (TICI $\geq$ 2b) | -48 mL  | 19.4 | 0.01   |
| ASPECTS (1-point increase)             | -14 mL  | 4.1  | <0.001 |
| Age (1 year increase)                  | -1.6 mL | 0.7  | 0.02   |

\*adjusted for collateral status

**Clinical outcome****Univariable logistic regression (mRS 0-2)**

| <b>Parameter</b>                     | <b>OR</b> | <b>95%CI</b> | <b>p value</b> |
|--------------------------------------|-----------|--------------|----------------|
| Age                                  | 0.96      | 0.93 – 0.99  | 0.02           |
| NIHSS                                | 0.77      | 0.67 – 0.88  | <0.001         |
| ASPECTS                              | 1.69      | 1.31 – 2.17  | <0.001         |
| Mechanical thrombectomy              | 1.46      | 0.56 – 3.85  | 0.44           |
| Recanalization status TIC1 $\geq$ 2b | 15.0      | 1.95 – 116.2 | 0.009          |
| Early lesion water uptake            | 0.76      | 0.66 – 0.87  | <0.001         |
| IV lysis                             | 5.52      | 1.76 – 17.3  | 0.003          |
| Collateral Score                     | 4.42      | 2.03 – 9.59  | <0.001         |

**Multivariable logistic regression (mRS 0-2) \***

| <b>Parameter</b>          | <b>OR</b> | <b>95%CI</b> | <b>p value</b> |
|---------------------------|-----------|--------------|----------------|
| Age                       | 0.92      | 0.87 – 0.01  | 0.01           |
| NIHSS                     | 0.75      | 0.62 – 0.92  | 0.005          |
| ASPECTS                   | 1.79      | 1.20 – 2.69  | 0.04           |
| Collateral Score          | 3.08      | 1.04 – 9.11  | 0.04           |
| Early lesion water uptake | 0.75      | 0.61 – 0.91  | 0.003          |

\*adjusted for recanalization status and application of intravenous lysis

**Multivariable linear regression mRS, successful recanalization (n=87)**

| <b>Parameter</b> | <b>Coefficient</b> | <b>SD</b> | <b>p value</b> |
|------------------|--------------------|-----------|----------------|
| (Constant)       | 0.26               | 1.09      | 0.82           |
| Age              | 0.05               | 0.01      | 0.00           |
| NIHSS            | 0.08               | 0.03      | 0.01           |
| ASPECTS          | -0.26              | 0.08      | 0.00           |
| Collateral Score | -0.41              | 0.21      | 0.05           |
| NWU_ADM          | 9.75               | 2.77      | 0.00           |
| iv_rtPA          | -0.75              | 0.31      | 0.02           |

**Multivariable linear regression mRS, no recanalization (n=42)**

| Parameter        | Coefficient | SD   | p value |
|------------------|-------------|------|---------|
| (Constant)       | 2.89        | 1.51 | 0.06    |
| NIHSS            | -0.07       | 0.23 | 0.76    |
| Collateral Score | -0.01       | 0.08 | 0.90    |

\* adjusted for recanalization Early lesion water uptake, ASPECTS, Age  
and application of intravenous lysis

**Supplemental Figure I- Clinical outcome in patients with poor collaterals and successful endovascular recanalization versus persistent vessel occlusion**

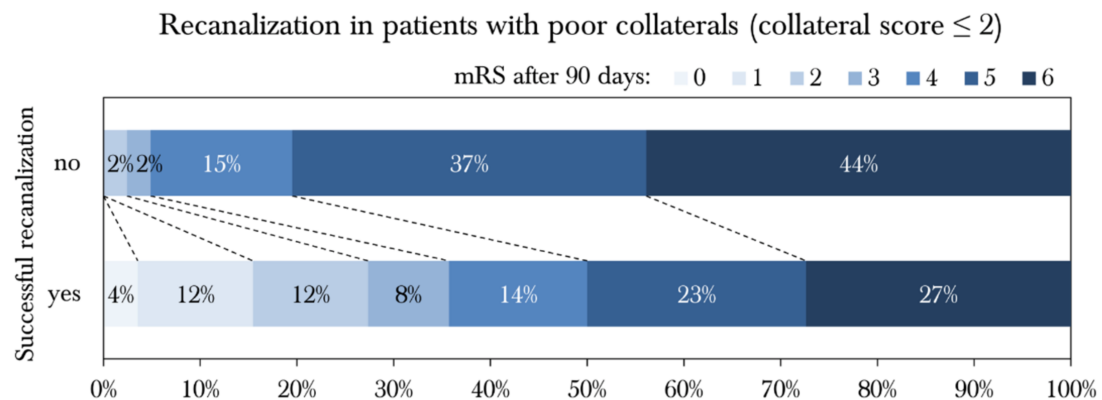

Bar graphs to display the impact of successful recanalization on clinical outcome indicated by modified Ranking scale scores at 90 days.
